# Supplementary material
Source: Research Square preprint supplement (doi:10.21203/rs.3.rs-9181680/v1)
Supplement: Supplementary file 1 [file 62938d3c6e857b07fec25cf6.docx]

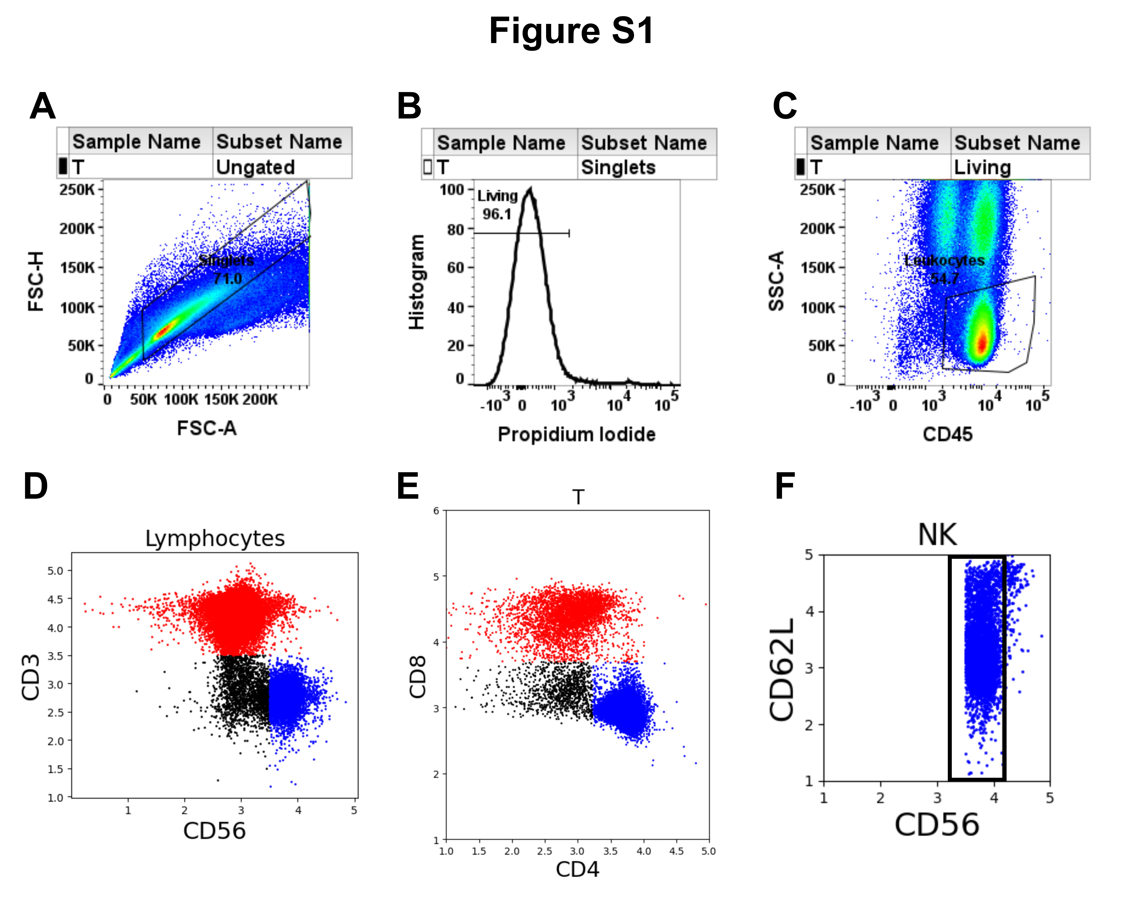


**Supplementary Figure 1: Gating strategy to define lymphocyte populations from a representative sample. (A)** Single cells were gated by forward scatter area and height. **(B)** Viable cells were gated as Ghost Red dye 710 negative. **(C)** Lymphocytes were selected as CD45+ side scatter low. Subsequent analysis of lymphocyte sub-populations was done in Python version 3.9 to facilitate mathematical analysis of the subsets. **(D)** T cells were identified as CD3+ and NK cells as CD3- CD56+. **(E)** CD4+ and CD8+ T cells were selected with double positives included in the CD8+ population. **(F)** CD56dim and CD56bright subsets of NK cells were selected with reference to CD62L, which is highly expressed on the CD56bright subset.

**
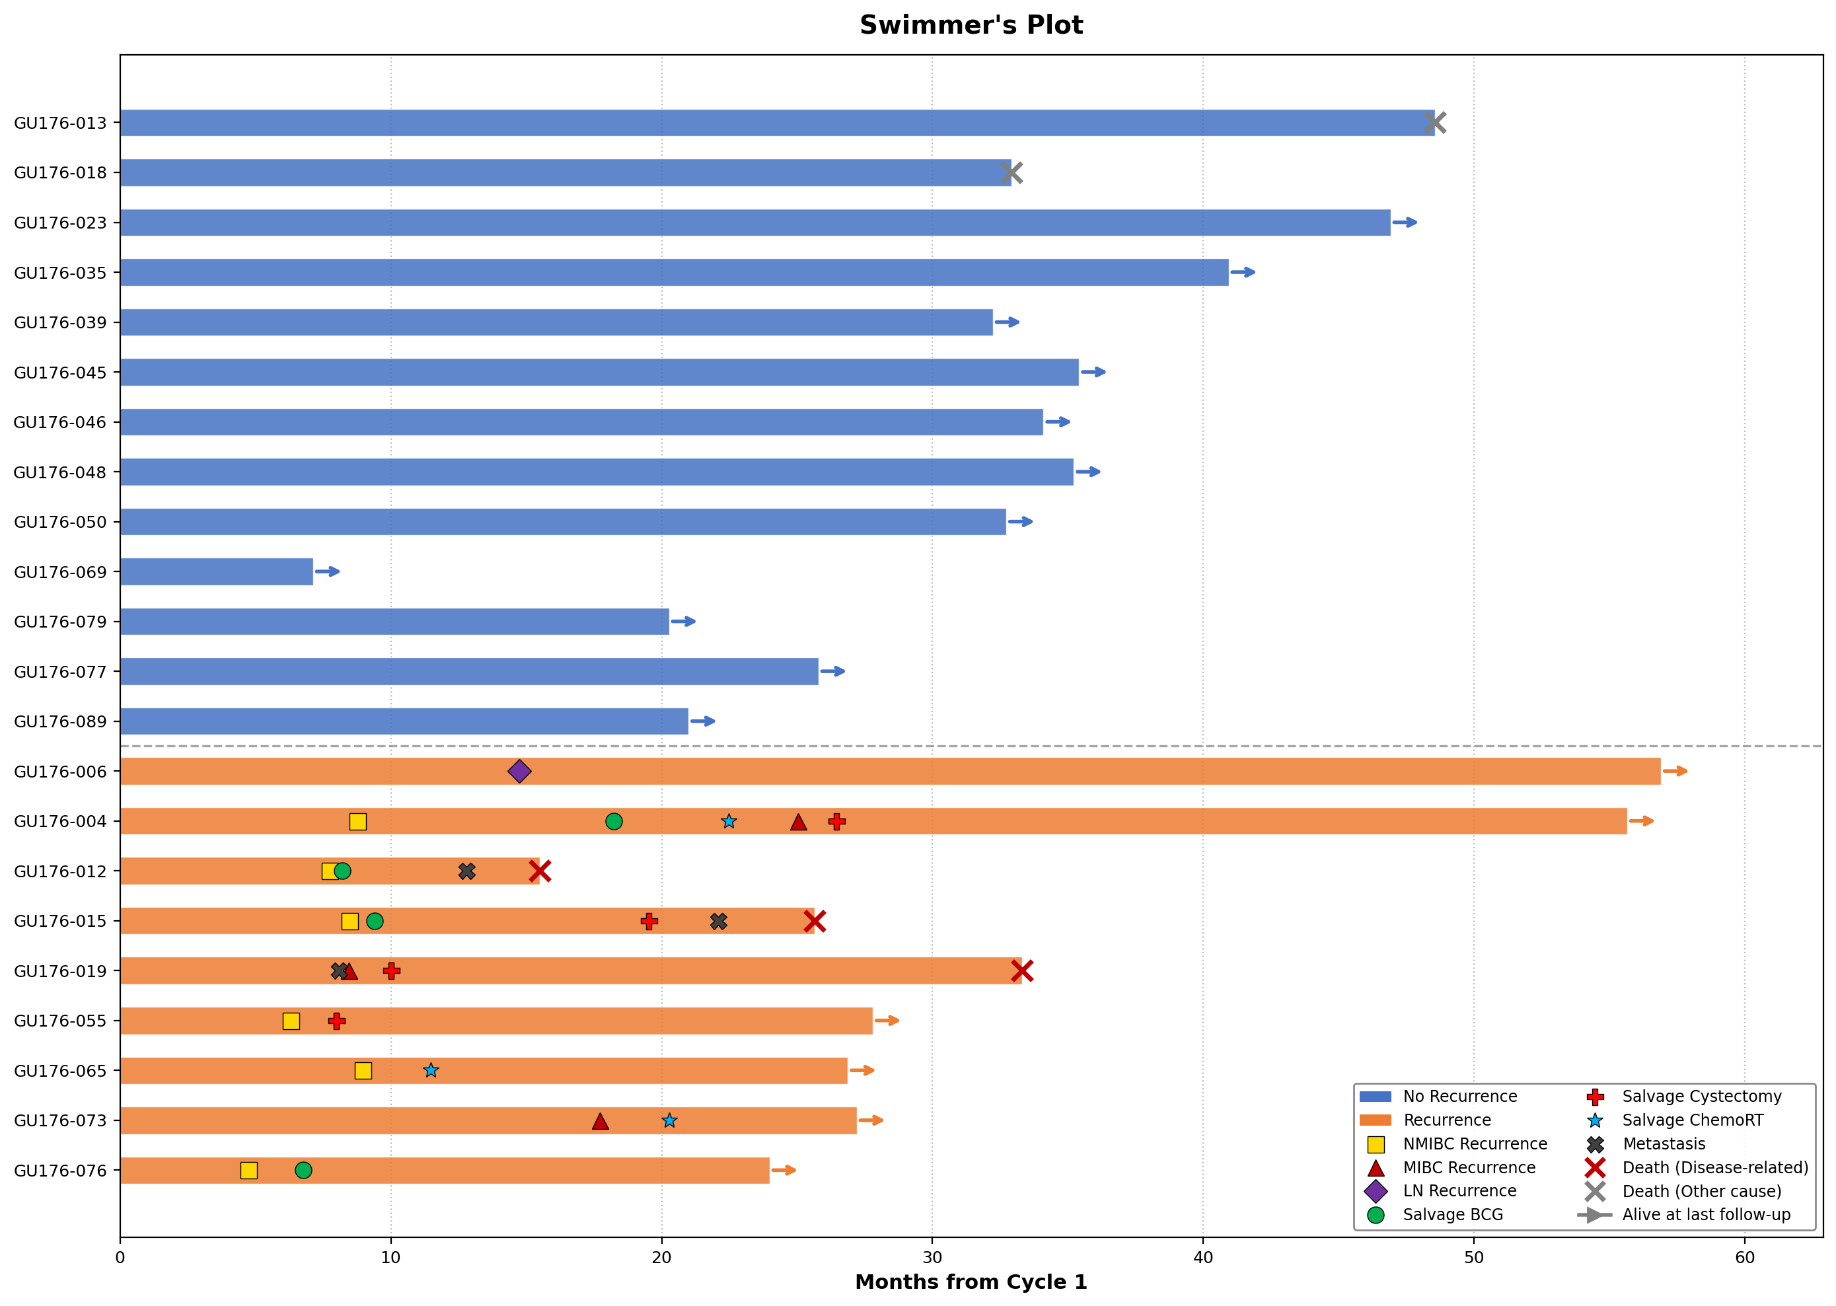

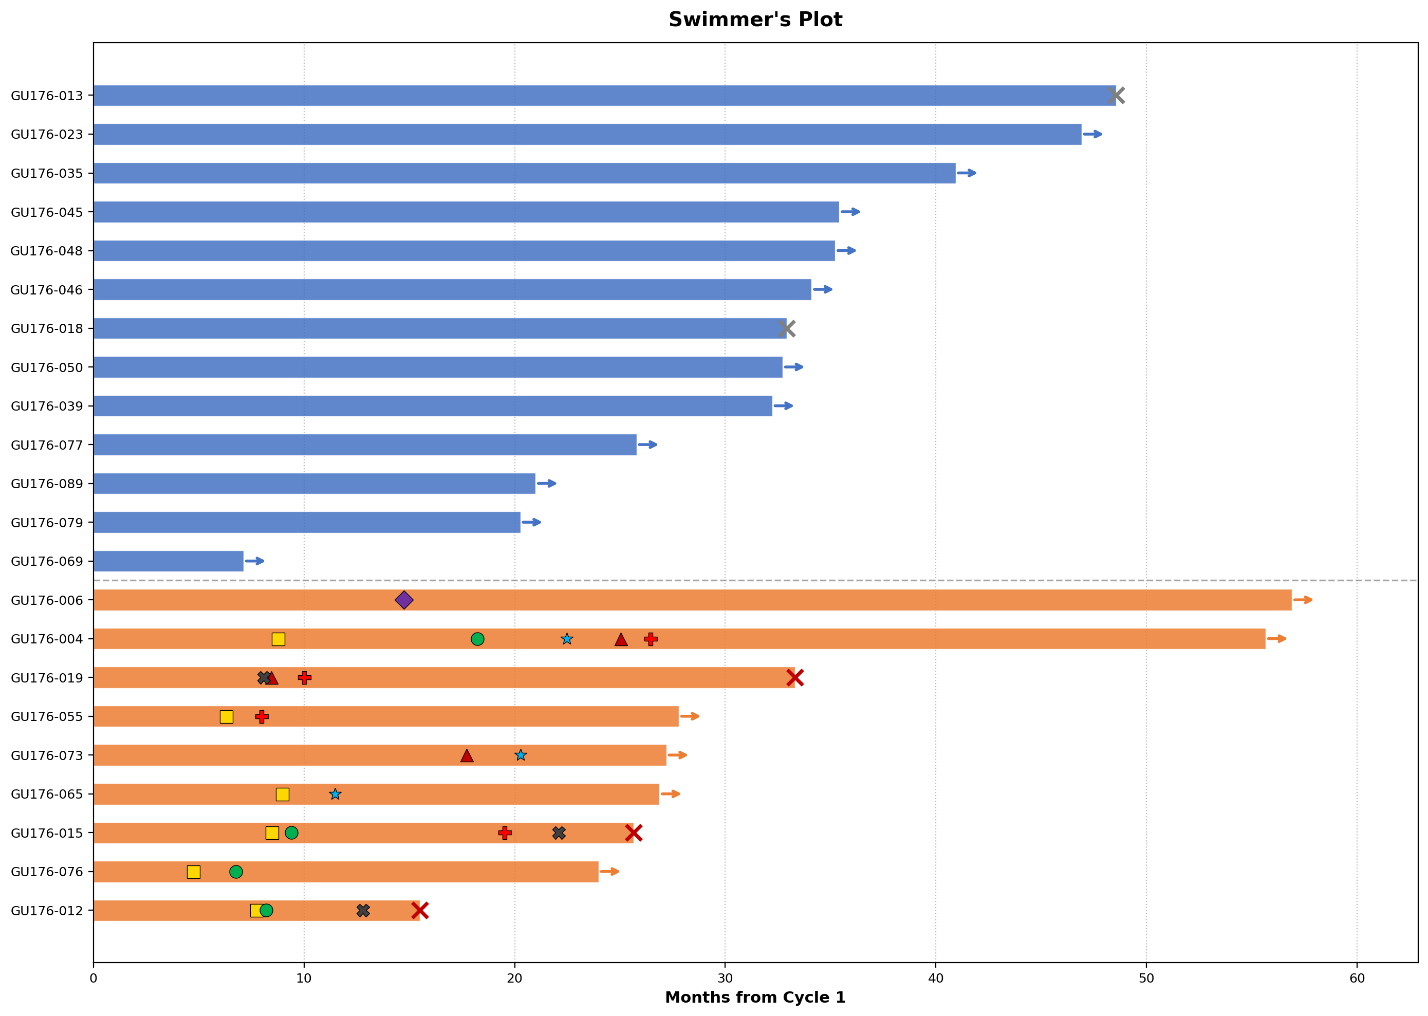
**

**Supplementary Figure 2: Swimmer’s plot with each lane representing a patient on active surveillance in RETAIN-2 trial**

**
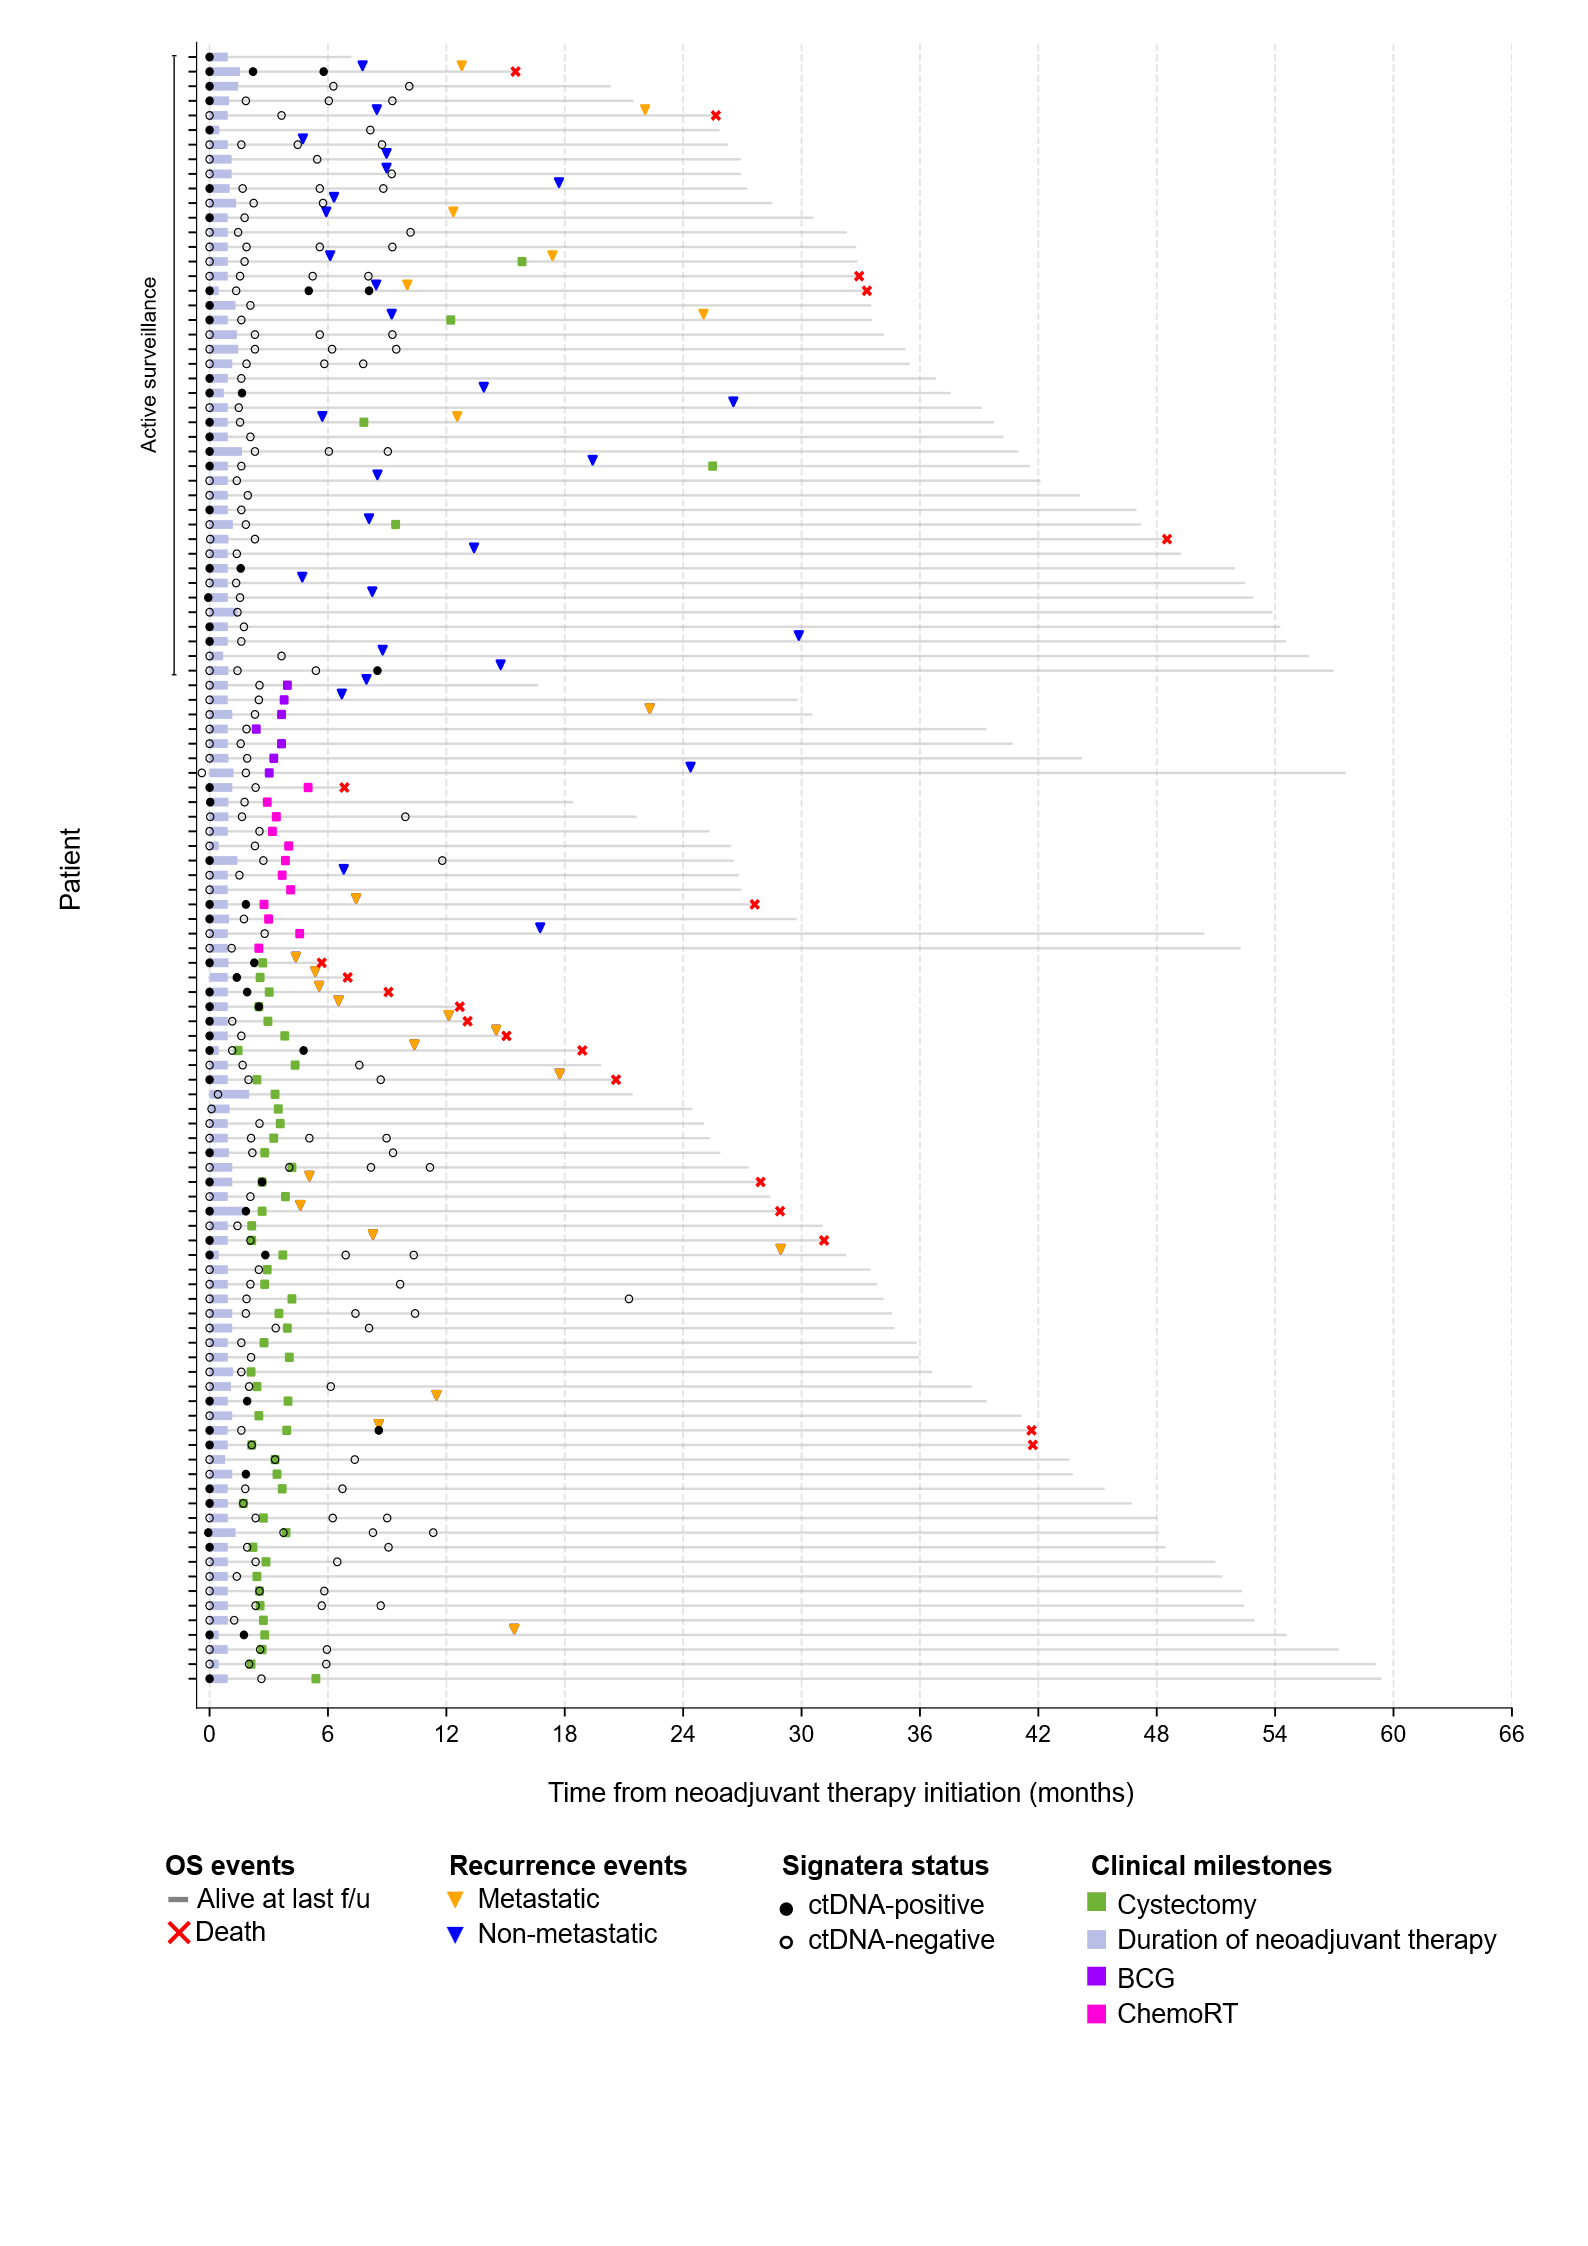
**

**Supplementary Figure 3: Swimmer’s plot with each lane representing a patient in the integrated ctDNA analysis cohort (RETAIN-1 and RETAIN-2)**


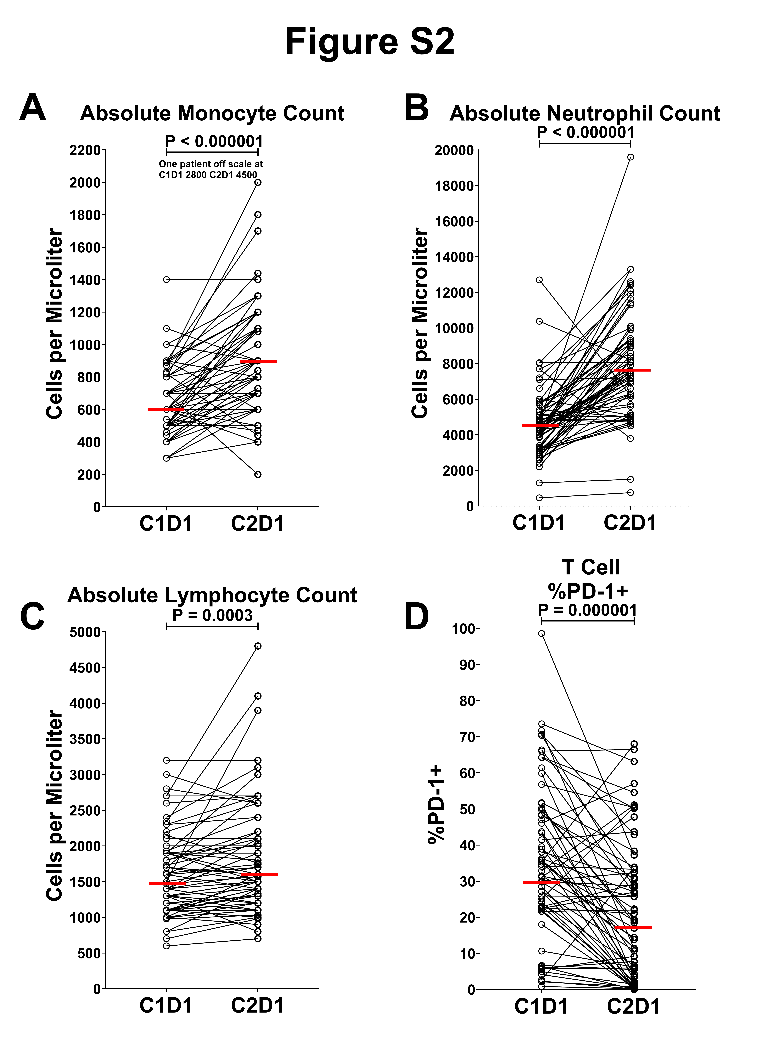


**Supplementary Figure 4: Changes in peripheral blood cell counts and T cell PD-1 expression from pre-treatment to cycle 2.** Pre-treatment (C1D1) and cycle 2 day 1 (C2D1) values for individual patients are shown as open circles connected by lines, with horizontal red bars indicating median values. P values were calculated using a Wilcoxon matched-pairs signed-rank test throughout. Absolute cell counts in panels **A–C** were derived from complete blood count (CBC) measurements. **(A)** Absolute monocyte counts at C1D1 and C2D1. One patient with an off-scale value at C1D1 (2,805 cells/µL) and C2D1 (4,586 cells/µL) is noted in the panel. **(B)** Absolute neutrophil counts at C1D1 and C2D1. **(C)** Absolute lymphocyte counts at C1D1 and C2D1. **(D)** %PD-1+ on CD3+ T cells gated as described above, at C1D1 and C2D1. Percent PD-1+ was calculated relative to a fluorescence-minus-one control tube containing all gating antibodies but no anti-PD-1 antibody.

| **Web-link** | **Target Biomarker** | **Fluorophore** | **Clone** | **Catalog number** | **Manufacturer** |
| --- | --- | --- | --- | --- | --- |
| 1 | CD19 | BV605 | HIB19 | 302244 | BioLegend |
| 2 | CD3 | PE/Cy7 | SK7 | 344816 | BioLegend |
| 3 | CD38 | AF488 | HIT2 | 303512 | BioLegend |
| 4 | CD4 | Alexa Fluor 700 | OKT4 | 317426 | BioLegend |
| 5 | CD4 | PerCP/Cy5.5 | OKT4 | 317428 | BioLegend |
| 6 | CD8a | Pacific Blue | HIT8a | 300928 | BioLegend |
| 7 | CD45 | PE/Cy7 | 2D1 | 560178 | BD Pharmingen |
| 8 | CD56 | FITC | B159 | 562794 | BD Biosciences |
| 9 | CD56 | BUV563 | NCAM16.2 | 612928 | BD Horizon |
| 10 | CD62L | FITC | DREG-56 | 304838 | BioLegend |
| 11 | CD62L | PE | DREG-56 | 304806 | BioLegend |
| 12 | CD62L | BUV737 | SK11 | 749210 | BD OptiBuild |
| 13 | CX3CR1 | APC | 2A9-1 | 341608 | BioLegend |
| 14 | CD69 | APC | FN50 | 310910 | BioLegend |
| 15 | TIM3 | PerCP/Cy5.5 | F38-2E2 | 345016 | BioLegend |
| 16 | Viability Dye | Ghost Red 710 |  | 13-0871-T100 | Tonbo Biosciences |
| 17 | PD-1 | unlabeled | Pembrolizumab |  | Merck |
| 18 | Ki-67 | BUV395 | B56 | 564071 | BD Horizon |
| 19 | TOX | APC | REA473 | 130-118-335 | Miltenyi |
| 20 | TCF1 | Alexa Fluor 488 | C6309 | 6444S | Cell Signaling |
| 21 | Anti-human IgG4 (2° for PD-1) | PE | HP6025 | 9200-09 | SouthernBiotech |

**Supplementary Table S1 – Staining reagents for flow cytometry correlative studies**

**Manufacturer’s weblinks for validation of flow cytometry antibodies used in this study**

1. <https://www.biolegend.com/en-us/products/brilliant-violet-605-anti-human-cd19-antibody-8483>
2. <https://www.biolegend.com/en-us/products/pe-cyanine7-anti-human-cd3-antibody-6934>
3. <https://www.biolegend.com/en-us/products/alexa-fluor-488-anti-human-cd38-antibody-3263>
4. <https://www.biolegend.com/en-us/products/alexa-fluor-700-anti-human-cd4-antibody-3661>
5. <https://www.biolegend.com/en-us/products/percp-cyanine5-5-anti-human-cd4-antibody-5011>
6. <https://www.biolegend.com/en-us/products/pacific-blue-anti-human-cd8a-antibody-6659>
7. <https://www.bdbiosciences.com/en-us/products/reagents/flow-cytometry-reagents/research-reagents/single-color-antibodies-ruo/apc-h7-mouse-anti-human-cd45.560178?tab=product_details>
8. <https://www.bdbiosciences.com/en-us/products/reagents/flow-cytometry-reagents/research-reagents/single-color-antibodies-ruo/fitc-mouse-anti-human-cd56-ncam-1.562794?tab=product_details>
9. <https://www.bdbiosciences.com/en-us/products/reagents/flow-cytometry-reagents/research-reagents/single-color-antibodies-ruo/buv563-mouse-anti-human-cd56.612928?tab=product_details>
10. <https://www.biolegend.com/en-us/products/fitc-anti-human-cd62l-antibody-651>
11. <https://www.biolegend.com/en-us/products/pe-anti-human-cd62l-antibody-653>
12. <https://www.bdbiosciences.com/en-us/products/reagents/flow-cytometry-reagents/research-reagents/single-color-antibodies-ruo/buv737-mouse-anti-human-cd62l.749210?tab=product_details>
13. <https://www.biolegend.com/en-us/products/alexa-fluor-647-anti-human-cx3cr1-antibody-5941>
14. <https://www.biolegend.com/en-us/products/apc-anti-human-cd69-antibody-1674>
15. <https://www.biolegend.com/en-us/products/percp-cyanine5-5-anti-human-cd366-tim-3-antibody-8438>
16. <https://cytekbio.com/products/ghost-dye-red-710?variant=40581221318692>
17. PD-1. Unlabeled. Pembrolizumab. Merck
18. <https://www.bdbiosciences.com/en-us/products/reagents/flow-cytometry-reagents/research-reagents/single-color-antibodies-ruo/buv395-mouse-anti-ki-67.564071?tab=product_details>
19. <https://www.miltenyibiotec.com/US-en/products/tox-antibody-anti-human-mouse-reafinity-rea473.html#conjugate=apc:size=100-tests-in-200-ul>
20. [https://www.cellsignal.com/products/antibody-conjugates/tcf1-tcf7-c63d9-rabbit-monoclonal-antibody-alexa-fluor-488-conjugate/6444](https://www.cellsignal.com/products/antibody-conjugates/tcf1-tcf7-c63d9-rabbit-monoclonal-antibody-alexa-fluor-488-conjugate/6444?srsltid=AfmBOoqqOphH8WTFVmqCfYLEYgSJPvQ_KHPCqRrwZZq7Yib2laC7wUxt)
21. <https://www.southernbiotech.com/mouse-anti-human-igg4-fc-pe-hp6025-9200-09>

|  | | | |
| --- | --- | --- | --- |
| **Toxicity Type** | **Grade 3** | **Grade 4** | **Grade 5** |
| Thrombocytopenia | **6 (7.5%)** | **5 (6.2%)** | - |
| Mucositis | **8 (10.0%)** | - | - |
| Leukopenia | **6 (7.5%)** | **2 (2.5%)** | - |
| Anemia | **7 (8.8%)** | - | - |
| Acute kidney injury | **6 (7.6%)** | - | - |
| Hyponatremia | **3 (3.8%)** | **1 (1.2%)** | - |
| Febrile neutropenia | **3 (3.8%)** | - | - |
| Pyelonephritis | **3 (3.8%)** | - | - |
| Pancytopenia | **2 (2.5%)** | - | **1 (1.2%)** |
| Aspartate aminotransferase increased | **2 (2.5%)** | **1 (1.2%)** | - |
| Dehydration | **2 (2.5%)** | - | - |
| Fatigue | **2 (2.5%)** | - | - |
| Blood bilirubin increased | **1 (1.2%)** | **1 (1.2%)** | - |
| Hypoxia | **1 (1.2%)** | **1 (1.2%)** | - |
| Neutrophil count decreased | - | **2 (2.5%)** | - |
| Urinary tract infection | **2 (2.5%)** | - | - |
| Syncope | **2 (2.5%)** | - | - |
| Diarrhea | **2 (2.5%)** | - | - |
| Fall | **2 (2.5%)** | - | - |
| Generalized muscle weakness | **2 (2.5%)** | - | - |
| Dysphagia | **1 (1.2%)** | - | - |
| Dizziness | **1 (1.2%)** | - | - |
| Alanine aminotransferase increased | **1 (1.2%)** | - | - |
| Enterocolitis | **1 (1.2%)** | - | - |
| Hypocalcemia | - | **1 (1.2%)** | - |
| Hyperglycemia | **1 (1.2%)** | - | - |
| Fever | **1 (1.2%)** | - | - |
| Insomnia | **1 (1.2%)** | - | - |
| Hypokalemia | **1 (1.2%)** | - | - |
| Hypomagnesemia | - | **1 (1.2%)** | - |
| Hypothyroidism | **1 (1.2%)** | - | - |
| Hyperkalemia | **1 (1.2%)** | - | - |
| Hyperlipidemia | **1 (1.2%)** | - | - |
| Hypoalbuminemia | **1 (1.2%)** | - | - |
| Multi-organ failure | - | - | **1 (1.2%)** |
| Nausea | **1 (1.2%)** | - | - |
| Lung infection | **1 (1.2%)** | - | - |
| Portal vein thrombosis | **1 (1.2%)** | - | - |
| Sepsis | **1 (1.2%)** | - | - |
| Urinary retention | **1 (1.2%)** | - | - |
| Thromboembolic event | **1 (1.2%)** | - | - |

* All patients treated with at least one dose of AMVAC and nivolumab

**Supplementary Table 2: RETAIN-2 grade 3 to 5 Treatment-related Adverse Events of all treated patients** (including those unevaluable for the primary endpoint)*

| **MFS** | | | | |
| --- | --- | --- | --- | --- |
| **Covariate** | **HR** | **HR lower 95% CI** | **HR upper 95% CI** | **p** |
| Post-NAT ctDNA status | 4.02 | 1.66 | 9.63 | 0.00257 |
| Baseline ctDNA status | 8.54 | 2.83 | 33.75 | 0.0000635 |
| Post-NAT non-cCR | 2.02 | 0.87 | 4.89 | 0.0997 |
|  | | | | |
| **OS** | | | | |
| **Covariate** | **HR** | **HR lower 95% CI** | **HR upper 95% CI** | **p** |
| Post-NAT ctDNA status | 2.01 | 0.74 | 5.44 | 0.169 |
| Baseline ctDNA status | 8.92 | 2.43 | 32.77 | 0.000981 |
| Post-NAT non-cCR | 4.08 | 1.42 | 11.67 | 0.00884 |

**Supplementary Table 3:** Multivariable analysis of pre- and post-NAT ctDNA status and clinical CR status in overall cohort
